# Supplementary material for: A mouse model of Zhu-Tokita-Takenouchi-Kim syndrome reveals indispensable SON functions in organ development and hematopoiesis
Source: PubMed Central journal article supplement (PMC10972584; doi:10.1172/jci.insight.175053), 2024-01-30

Figure 11

Lung\_Son

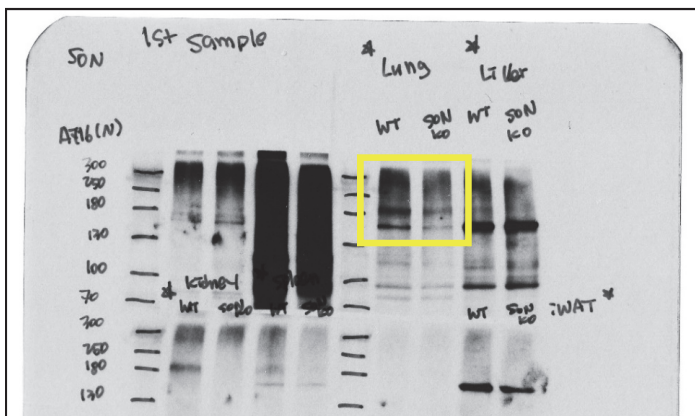

Lung\_β-tubulin

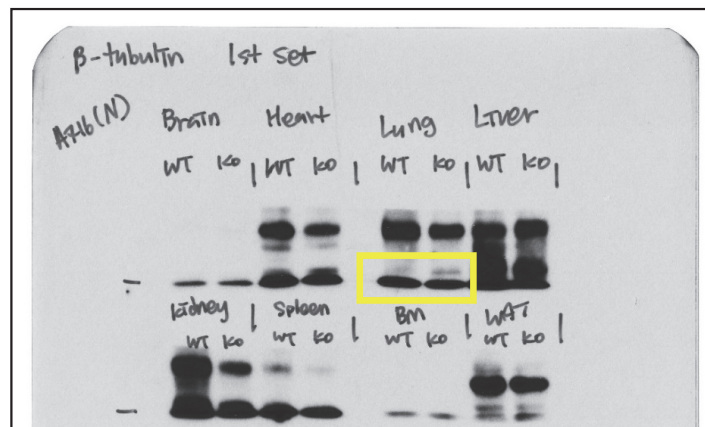

Figure 11

Kidney\_Son

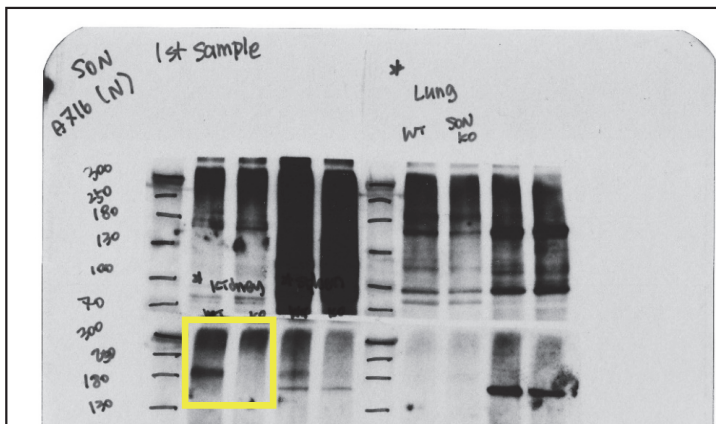

Kidney\_β-tubulin

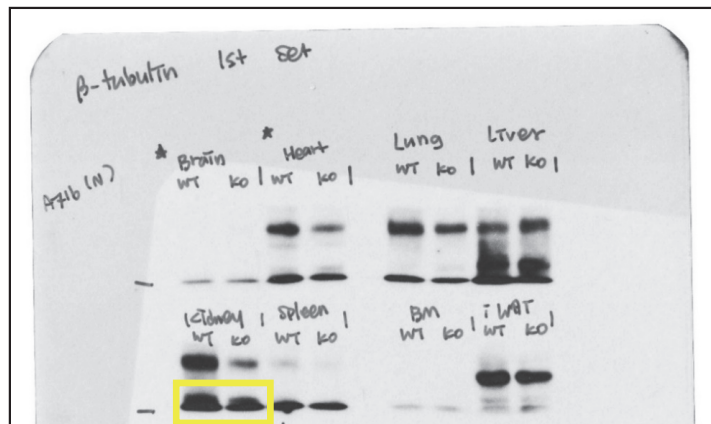

Figure 11

Spleen\_Son

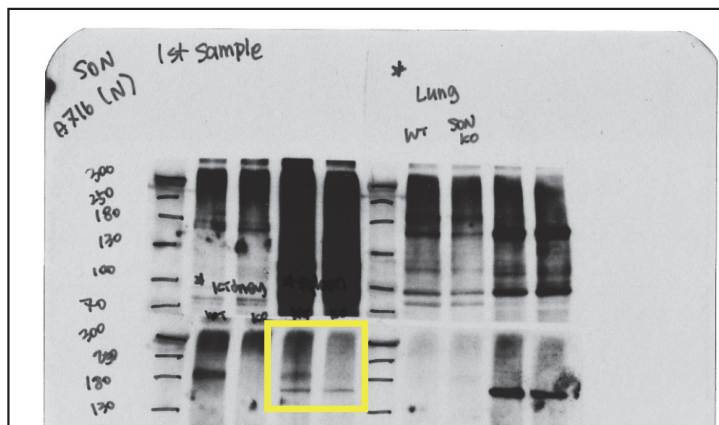

Spleen\_β-tubulin

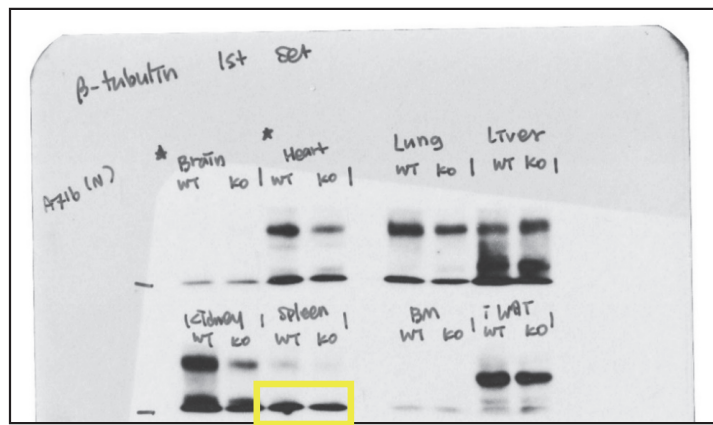

Figure 11

Liver\_Son

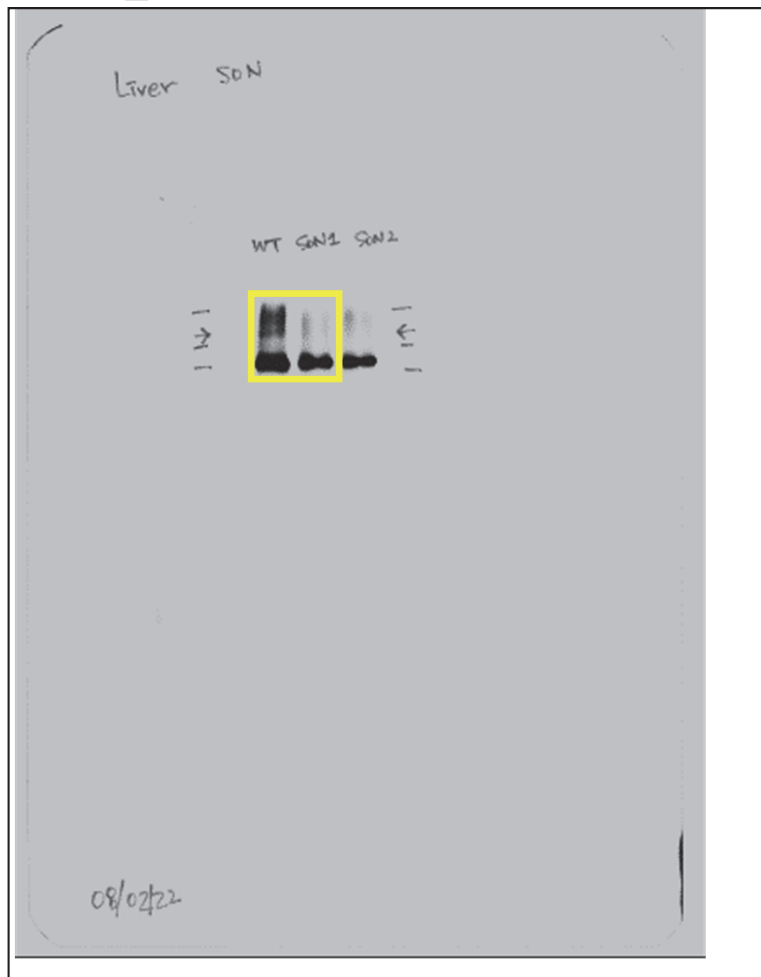

Liver\_β-actin

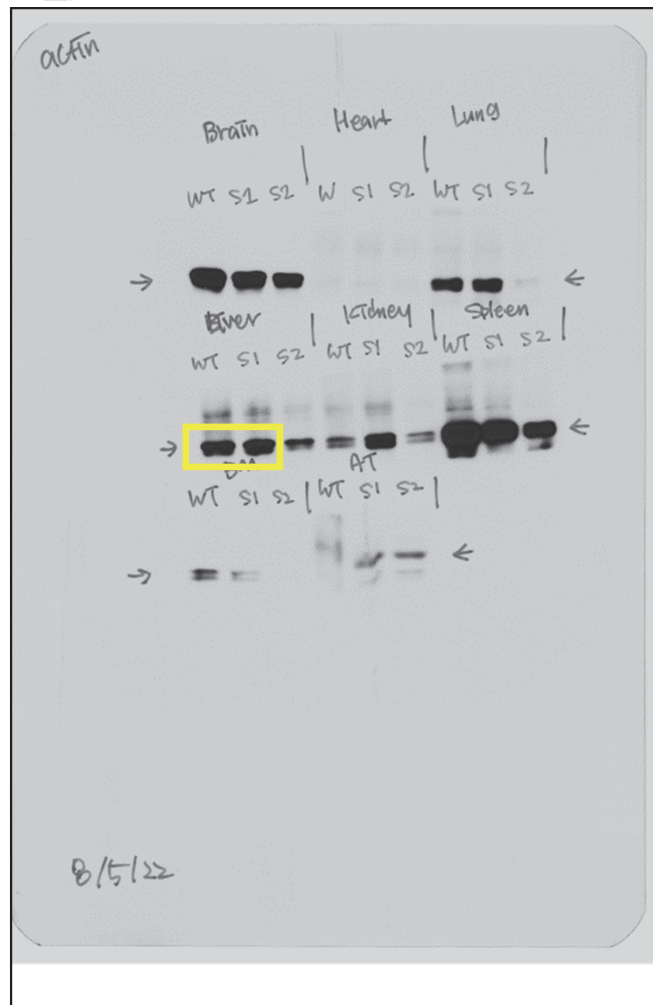

Supplemental Figure 2D

Brain\_Son

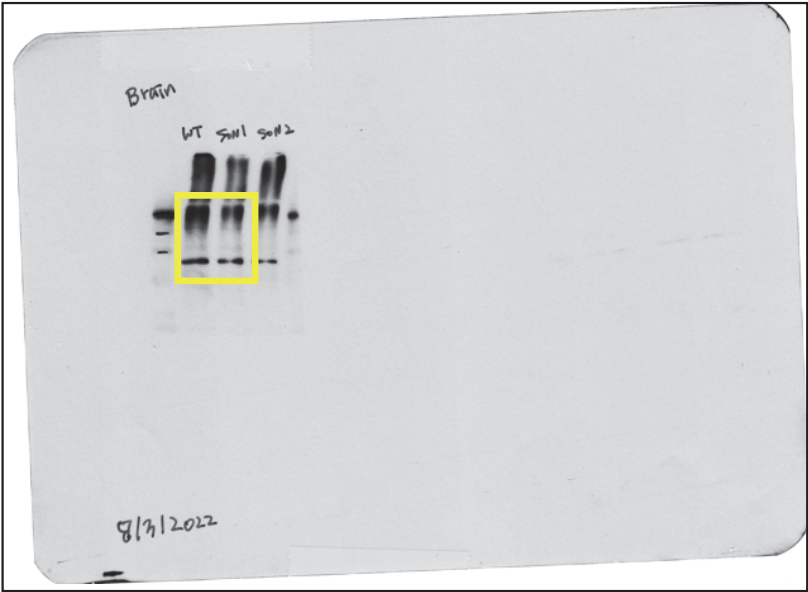

Brain\_β-actin

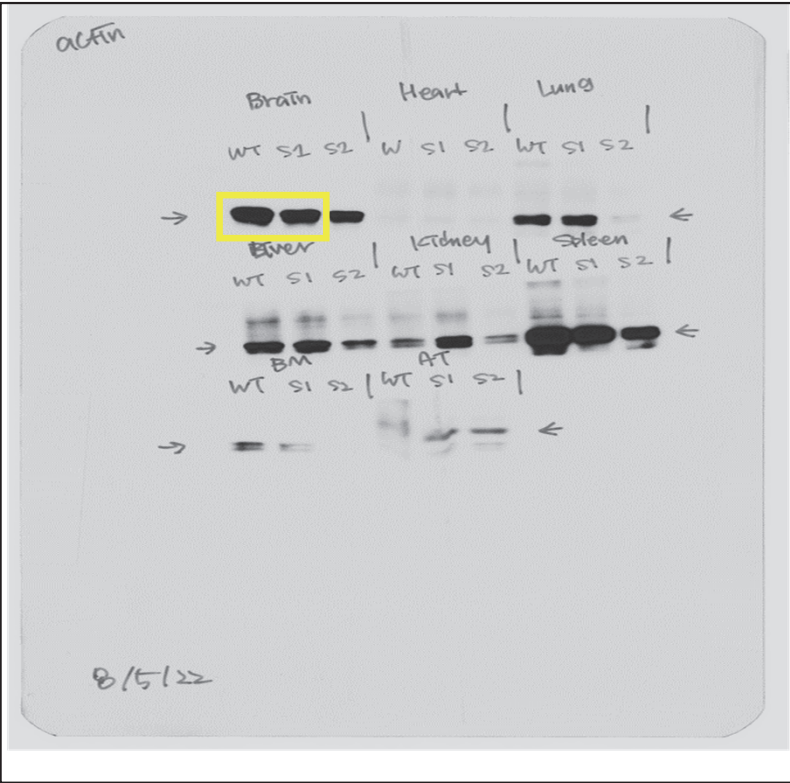

## Supplemental Figure 2D

### Heart\_Son

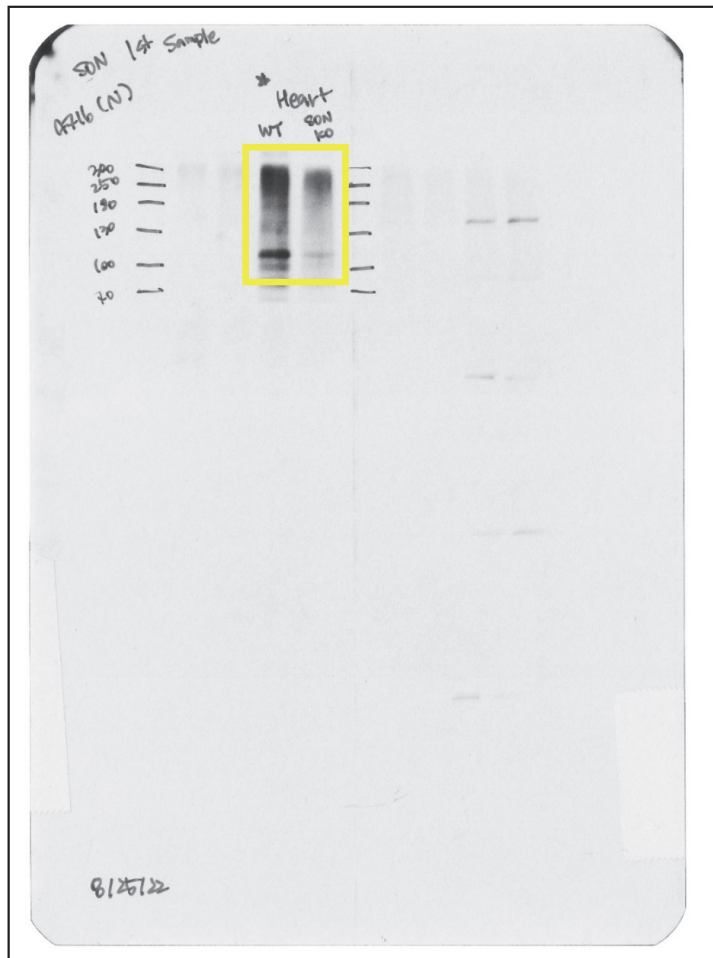

### Heart\_β-tubulin

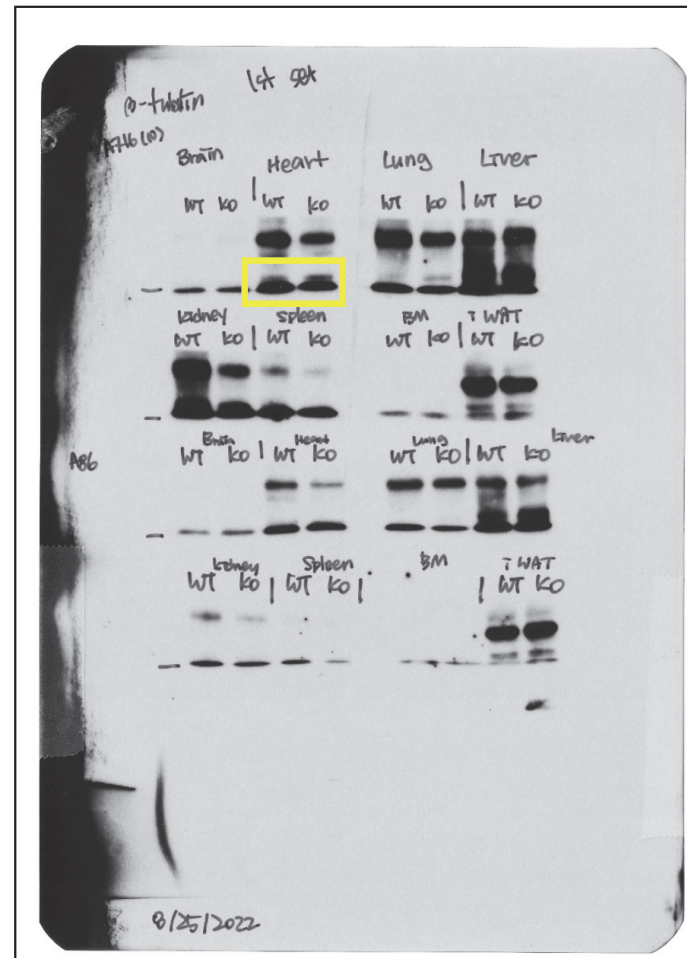



Supplemental Figure 2D

Bone marrow\_Son

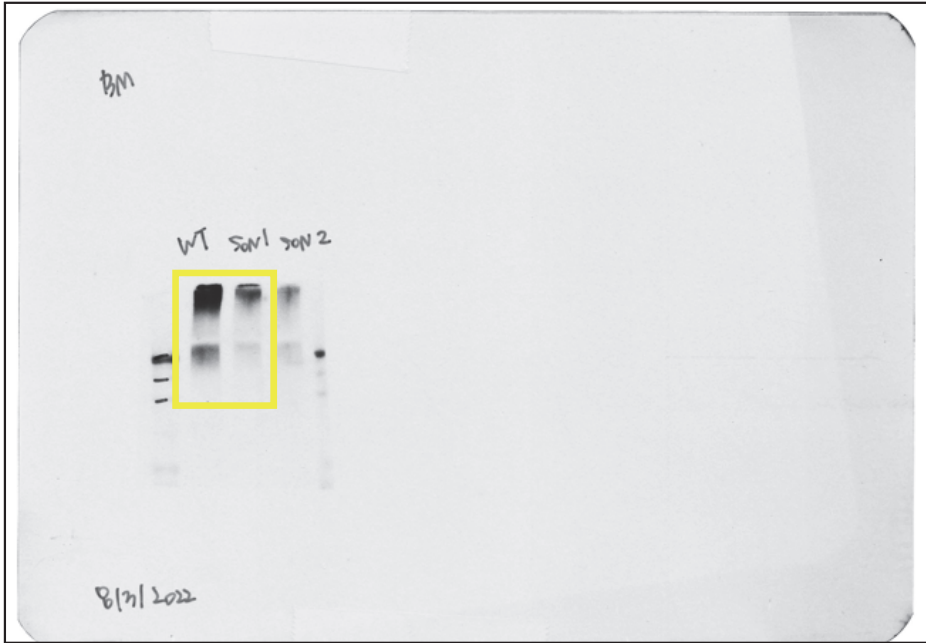

Bone marrow\_β-actin

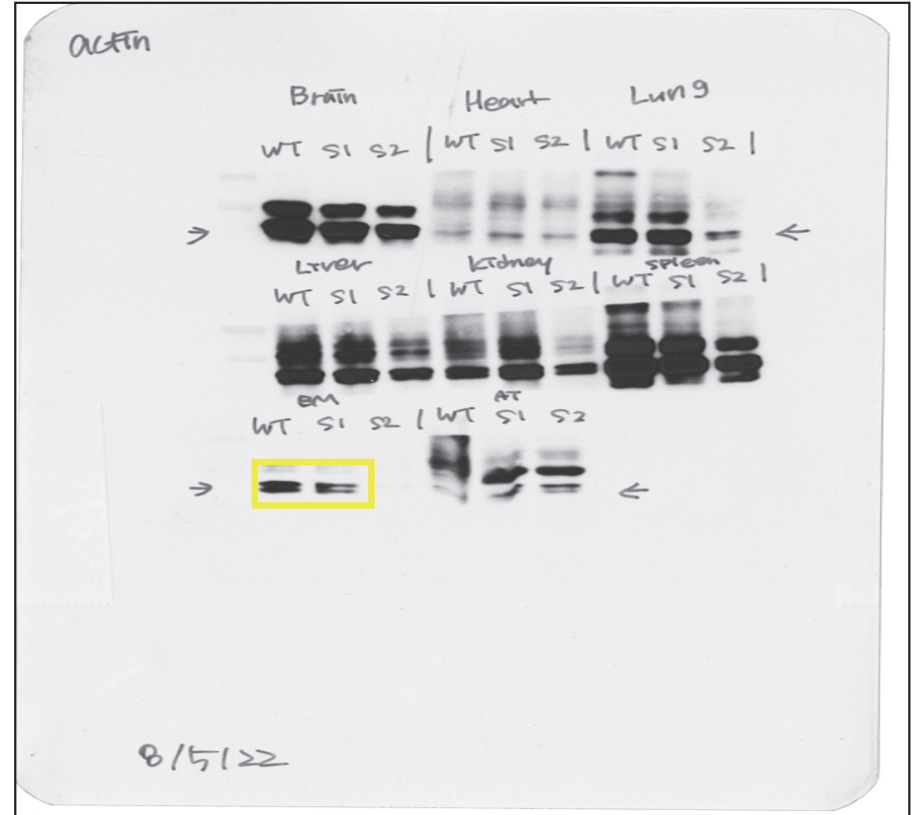

Supplement: jciinsight-9-175053-s067.pdf [file jciinsight-9-175053-s067.pdf]
